# Supplementary material for: Hemostatic and antibacterial calcium–copper zeolite gauze for infected wound healing
Source: Royal Society of Chemistry journal article supplement (doi:10.1039/d3ra06070e), 2024-01-01
Supplement: d3ra06070e1.pdf [file d3ra06070e1.pdf]

## SUPPLEMENTARY INFORMATION

### **Hemostatic and Antibacterial Calcium-Copper Zeolite Gauze for Infected Wound Healing**

Mingtao Wang,<sup>a</sup> Wenzhao Zhang,<sup>a</sup> Chenchen Wang,<sup>a</sup> Liping Xiao,<sup>\*,a</sup> Lisha Yu<sup>\*,a,b</sup> and Jie Fan<sup>\*,a</sup>

## Supplementary Figures

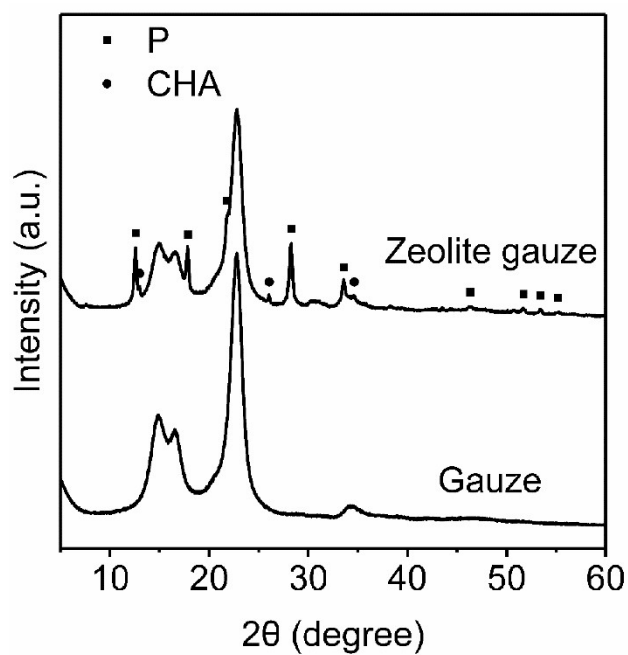

**Fig. S1** XRD patterns of zeolite gauze and gauze.

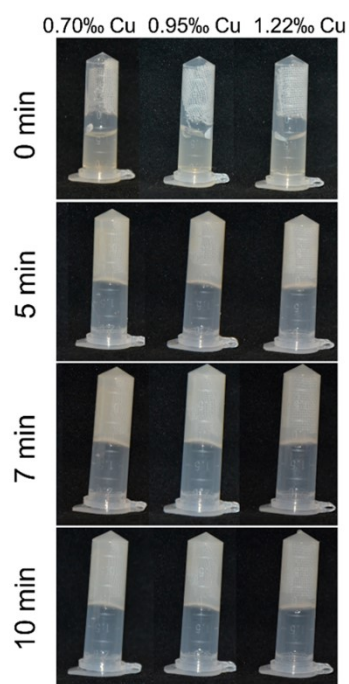

**Fig. S2** Photograph of CaCu-ZG in the in vitro plasma clotting assay.

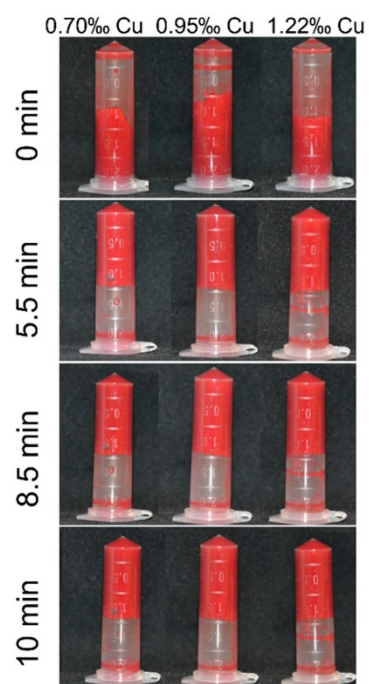

**Fig. S3** Photograph of CaCu-ZG in the in vitro blood clotting assay.

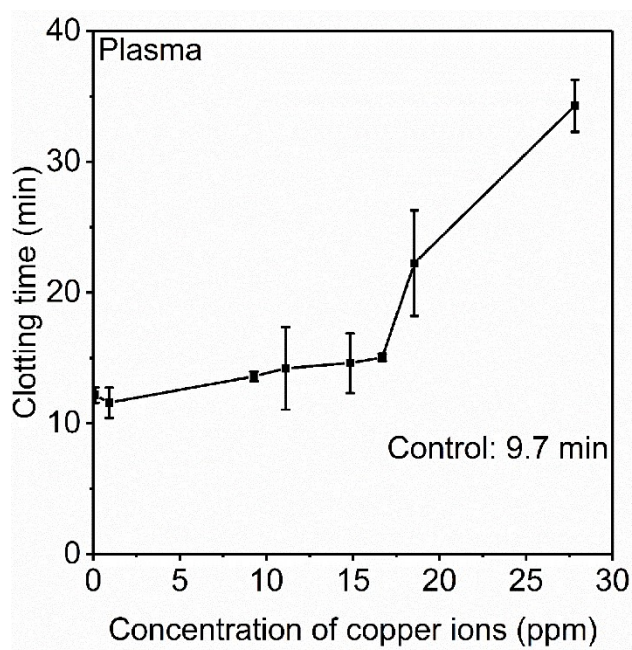

**Fig. S4** Plasma clotting time of different copper ion concentrations ( $n = 3$ ). Error bars, mean  $\pm$  SD. The clotting time of normal plasma in the blank control group is 9.7 min.

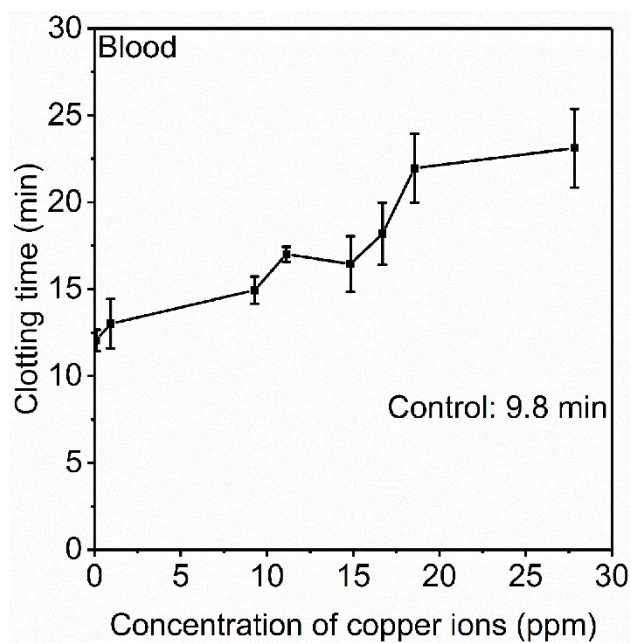

**Fig. S5** Blood clotting time of different copper ion concentrations ( $n = 3$ ). Error bars, mean  $\pm$  SD. The clotting time of normal plasma in the blank control group is 9.8 min.

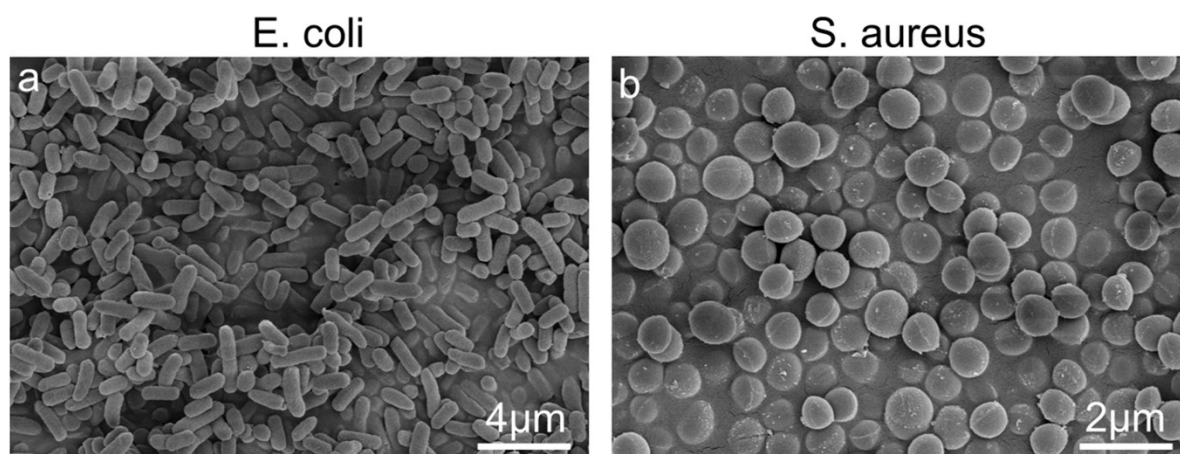

**Fig. S6** (a) SEM image of *E. coli* without any treatment. (b) SEM image of *S. aureus* without any treatment.

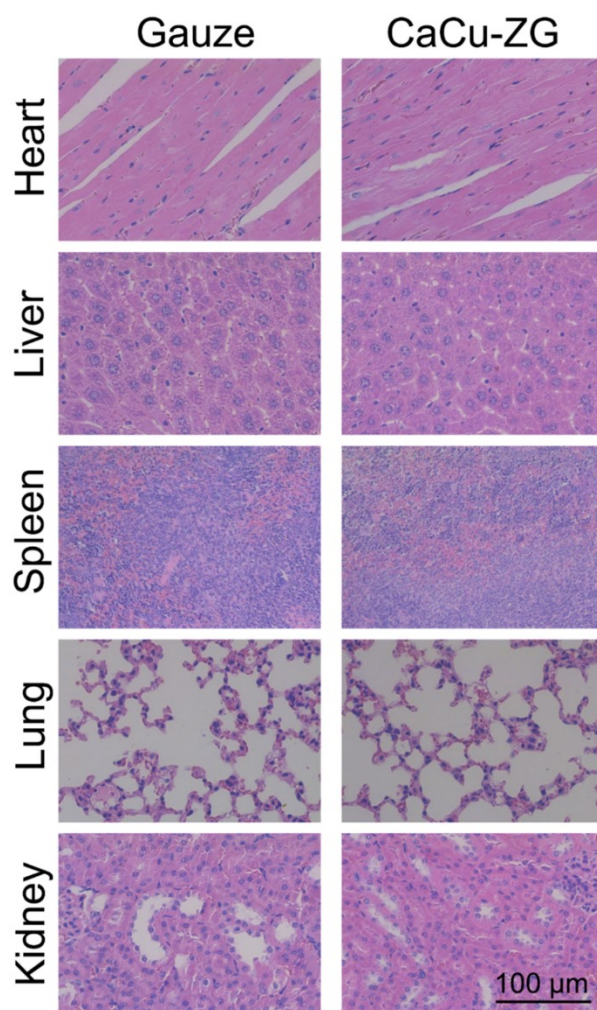

**Fig. S7** HE staining for major organs of mice treated with gauze and CaCu-ZG (1.22% Cu).



## Supplementary Tables

**Table S1** Content of zeolite on the surface of CaCu-ZG (prepared with copper ion solution at a concentration of 100 ppm).

| Sample      | 1   | 2   | 3   | Mean | Standard deviation |
|-------------|-----|-----|-----|------|--------------------|
| Zeolite (%) | 5.6 | 6.8 | 5.5 | 6    | 0.75               |
